# Supplementary material
Source: PubMed Central journal article supplement (PMC5837448)
Supplement: aww322_supp.pdf [file aww322_supp.pdf]

## Supplementary information

Validation procedure of the fit describing the increase of the interclonic intervals at the end of a seizure.

Our model predicts that interclonic intervals increase in an exponential manner at the end of a seizure. To validate this prediction in our clinical sample, we compare the exponential ( $\log(\text{ICI}) \sim t$ ), logarithmic ( $\text{ICI} \sim \log(t)$ ) and power law ( $\log(\text{ICI}) \sim \log(t)$ ) fits. The results are shown in figure S1, S2 and S3.

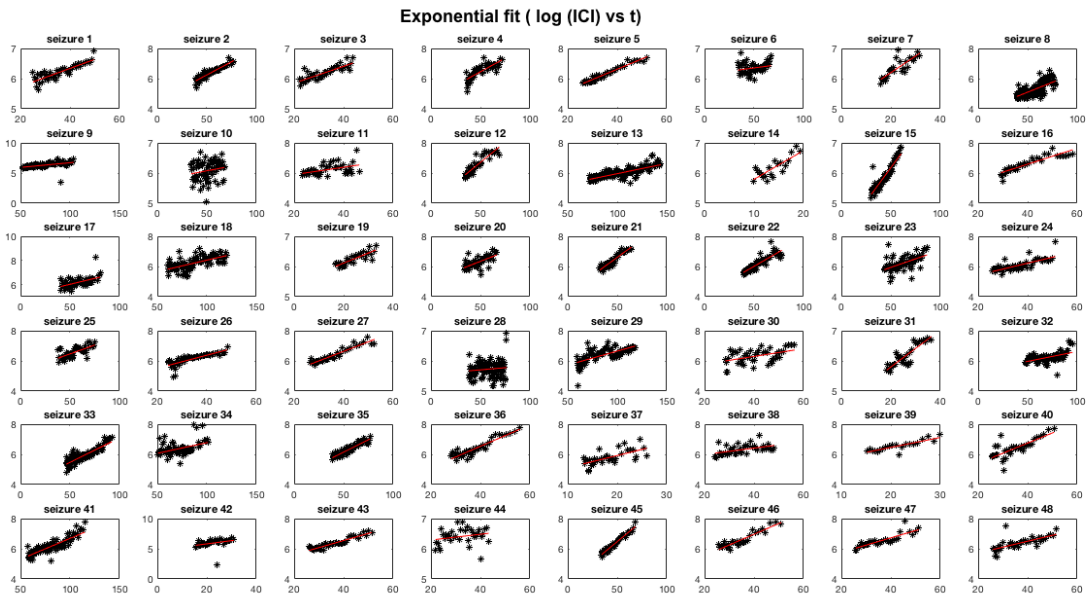

*Figure S1 Exponential fit on our human EEG data set. Every panel represents one seizure from one individual. The black dots are the manually scored interclonic intervals (ICI), the red line represents the fit:  $\log(\text{ICI}) = at+b$  [equivalent to the exponential relationship:  $\text{ICI} = \exp(at+b)$ ] - the fit used in our model. On the vertical axis the  $\text{Log}(\text{ICI})$  is shown, on the horizontal axis the time since the start of the clonic phase in seconds.*

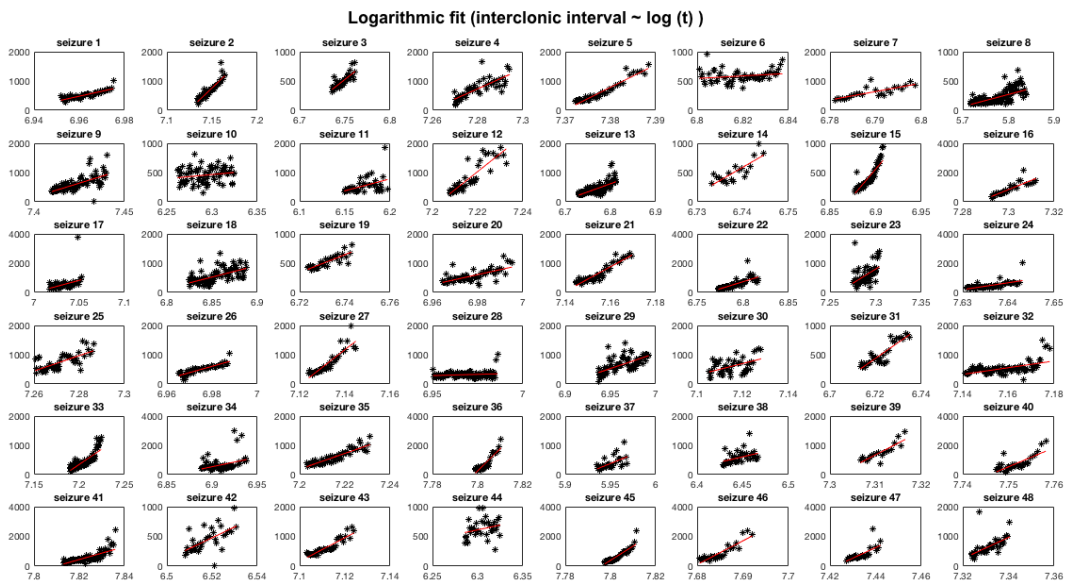

*Figure S2 Logarithmic fit on our human EEG data set. Every panel represents one seizure from one individual. The black dots are the manually scored interclonic intervals (ICI), the red line represents*

the fit:  $ICI = a \cdot \log(t) + b$ , the fit in the model of Jirsa et al. On the vertical axis the ICI is shown in milliseconds, on the horizontal axis the  $\log(\text{time})$  since the start of the clonic phase in seconds.

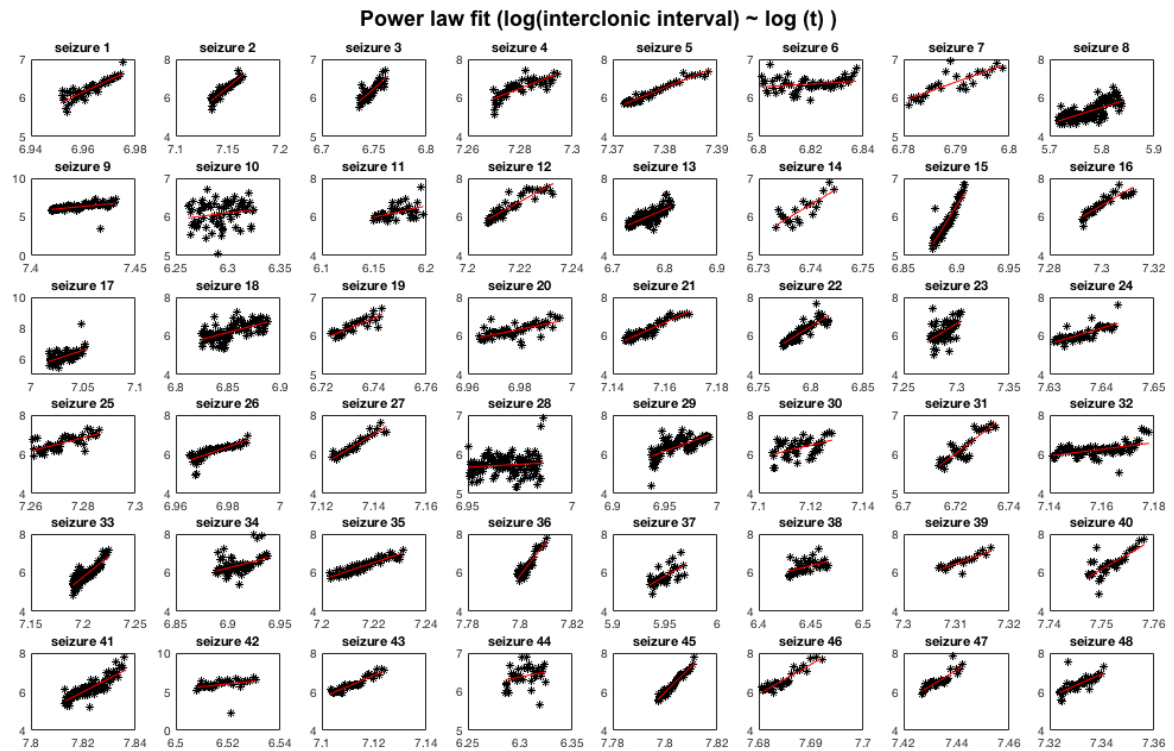

**Figure S3** Power law fit on our human EEG data set. Every panel represents one seizure from one individual. The black dots are the manually scored interclonic intervals (ICI), the red line represents the fit:  $\log(ICI) = a \cdot \log(t) + b$ , on the vertical axis  $\log(ICI)$  is shown, on the horizontal axis the  $\log(\text{time})$  since the start of the clonic phase in seconds.

The goodness of fit was calculated for each fit using  $R^2$ , Root Mean Square Error (RMSE) and the relative systematic error defined as:

$$RM = \text{mean}(|\text{Obs} - \text{fit}|) / (\text{Obs})$$

where  $|x|$  denotes the absolute value of  $x$ .

This latter calculation, in our view, better takes into account the error of the fit when the interclonic interval is small.

A  $R^2$  value close to 1 denotes a good fit. The lower the RMSE and relative systematic error value the better fit. The results of the  $R^2$ , RMSE and RM are shown in table S1. There was no significant difference between the  $R^2$  and RMSE of the fits.

The RM, however, was significantly larger in the logarithmic fit compared to the exponential fit ( $p < 0.0001$ ), see figure S4. The RM of the exponential and power law fits did not significantly differ, see figure S5.

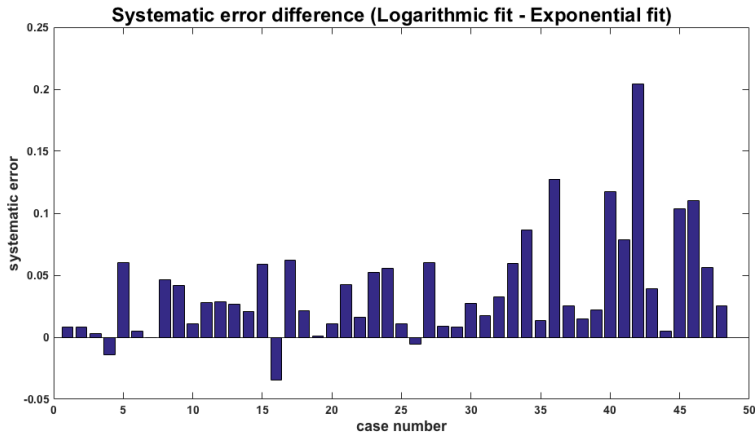

*Figure S4 Histogram showing the difference in relative systematic error (RM) between the logarithmic fit and the exponential fit for each seizure. The seizures 1-48 are shown on the horizontal axes, the systematic error is shown on the vertical axis. For 45 of the 48 seizures, the logarithmic fit (figure S2) has a greater systematic error than the exponential fit (figure S1).*

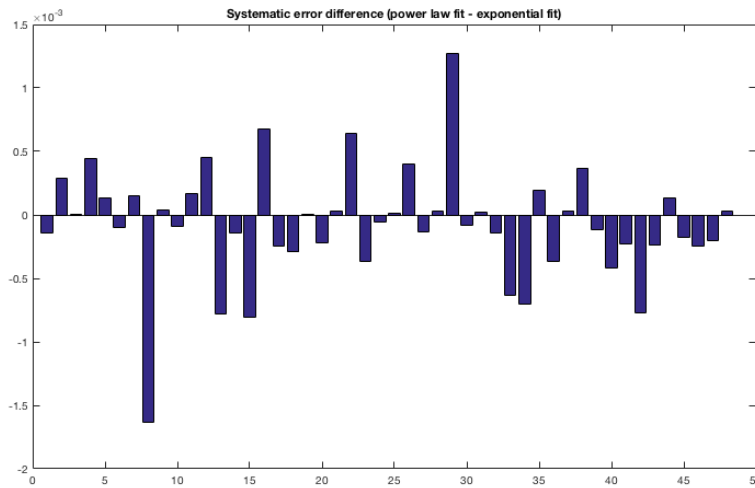

*Figure S5 Histogram showing the difference in relative systematic error (RM) between the power law fit and the exponential fit for each seizure. The seizures 1-48 are shown on the horizontal axes, the systematic error is shown on the vertical axis. There was no statistically significant difference between the systematic error of the power law fit (figure S3) and the systematic error of the exponential fit (figure S1).*

**Table S1: Errors of the exponential, logarithmic and power law fit.**

For each case (1-48) and fit (exponential, logarithmic, power law), the error measures are given. Exp=exponential, log=logarithmic, powerL=power law, R<sup>2</sup>=R<sup>2</sup>, RM=relative systematic error, RMSE=root-mean square error.

| Case | R <sup>2</sup><br>exp | R <sup>2</sup><br>log | R <sup>2</sup><br>powerL | RM<br>exp | RM<br>log | RM<br>powerl | RMSE<br>exp | RMSE<br>log | RMSE<br>powerL |
|------|-----------------------|-----------------------|--------------------------|-----------|-----------|--------------|-------------|-------------|----------------|
| 1    | 0.779                 | 0.744                 | 0.780                    | 0.092     | 0.100     | 0.091        | 62.23       | 66.94       | 62.06          |
| 2    | 0.870                 | 0.856                 | 0.869                    | 0.101     | 0.108     | 0.101        | 98.75       | 103.81      | 98.90          |
| 3    | 0.683                 | 0.668                 | 0.683                    | 0.089     | 0.091     | 0.089        | 62.09       | 63.57       | 62.03          |
| 4    | 0.564                 | 0.634                 | 0.563                    | 0.225     | 0.212     | 0.226        | 211.12      | 193.54      | 211.45         |
| 5    | 0.926                 | 0.923                 | 0.925                    | 0.085     | 0.143     | 0.085        | 98.30       | 99.73       | 98.89          |
| 6    | 0.043                 | 0.046                 | 0.044                    | 0.126     | 0.131     | 0.126        | 102.42      | 102.24      | 102.36         |
| 7    | 0.599                 | 0.621                 | 0.598                    | 0.122     | 0.122     | 0.122        | 122.65      | 119.12      | 122.73         |
| 8    | 0.485                 | 0.479                 | 0.490                    | 0.211     | 0.251     | 0.209        | 70.67       | 71.12       | 70.33          |
| 9    | 0.426                 | 0.457                 | 0.426                    | 0.408     | 0.449     | 0.408        | 188.64      | 183.36      | 188.58         |
| 10   | 0.019                 | 0.040                 | 0.019                    | 0.258     | 0.269     | 0.258        | 128.84      | 127.45      | 128.84         |
| 11   | 0.163                 | 0.190                 | 0.163                    | 0.231     | 0.258     | 0.231        | 240.03      | 236.13      | 240.02         |
| 12   | 0.682                 | 0.792                 | 0.679                    | 0.183     | 0.210     | 0.183        | 279.45      | 226.13      | 280.87         |
| 13   | 0.620                 | 0.594                 | 0.625                    | 0.126     | 0.150     | 0.125        | 102.51      | 106.02      | 101.91         |
| 14   | 0.707                 | 0.661                 | 0.708                    | 0.158     | 0.179     | 0.158        | 97.74       | 105.13      | 97.61          |
| 15   | 0.885                 | 0.803                 | 0.887                    | 0.093     | 0.149     | 0.092        | 57.70       | 75.46       | 57.10          |
| 16   | 0.664                 | 0.777                 | 0.662                    | 0.166     | 0.132     | 0.167        | 241.53      | 196.75      | 242.32         |
| 17   | 0.142                 | 0.155                 | 0.143                    | 0.193     | 0.254     | 0.193        | 372.17      | 369.28      | 371.95         |
| 18   | 0.366                 | 0.383                 | 0.365                    | 0.257     | 0.278     | 0.257        | 183.46      | 180.95      | 183.60         |
| 19   | 0.693                 | 0.692                 | 0.693                    | 0.086     | 0.087     | 0.086        | 58.73       | 58.88       | 58.74          |
| 20   | 0.503                 | 0.483                 | 0.505                    | 0.193     | 0.204     | 0.193        | 150.11      | 153.18      | 149.88         |
| 21   | 0.899                 | 0.883                 | 0.899                    | 0.110     | 0.150     | 0.110        | 98.15       | 106.07      | 98.48          |
| 22   | 0.570                 | 0.615                 | 0.567                    | 0.133     | 0.146     | 0.133        | 200.95      | 190.11      | 201.65         |
| 23   | 0.315                 | 0.298                 | 0.316                    | 0.263     | 0.315     | 0.263        | 238.09      | 240.94      | 237.81         |
| 24   | 0.420                 | 0.399                 | 0.420                    | 0.140     | 0.195     | 0.140        | 195.42      | 198.79      | 195.30         |
| 25   | 0.532                 | 0.518                 | 0.533                    | 0.187     | 0.198     | 0.187        | 183.97      | 186.80      | 183.86         |
| 26   | 0.768                 | 0.778                 | 0.768                    | 0.162     | 0.156     | 0.162        | 77.75       | 76.06       | 77.82          |
| 27   | 0.825                 | 0.819                 | 0.824                    | 0.102     | 0.161     | 0.102        | 159.92      | 162.57      | 160.34         |
| 28   | 0.013                 | 0.031                 | 0.013                    | 0.186     | 0.195     | 0.186        | 98.93       | 98.01       | 98.93          |
| 29   | 0.376                 | 0.453                 | 0.373                    | 0.269     | 0.279     | 0.270        | 205.00      | 192.02      | 205.48         |
| 30   | 0.234                 | 0.241                 | 0.234                    | 0.356     | 0.383     | 0.356        | 227.70      | 226.62      | 227.56         |
| 31   | 0.808                 | 0.793                 | 0.808                    | 0.123     | 0.140     | 0.123        | 83.25       | 86.52       | 83.28          |
| 32   | 0.321                 | 0.322                 | 0.324                    | 0.195     | 0.227     | 0.195        | 168.56      | 168.48      | 168.19         |
| 33   | 0.792                 | 0.702                 | 0.795                    | 0.170     | 0.227     | 0.169        | 104.50      | 125.10      | 103.70         |
| 34   | 0.122                 | 0.146                 | 0.124                    | 0.249     | 0.334     | 0.248        | 425.37      | 419.59      | 424.96         |
| 35   | 0.853                 | 0.843                 | 0.853                    | 0.112     | 0.124     | 0.113        | 89.34       | 92.41       | 89.46          |
| 36   | 0.921                 | 0.832                 | 0.921                    | 0.159     | 0.285     | 0.159        | 139.76      | 203.52      | 139.35         |
| 37   | 0.347                 | 0.370                 | 0.346                    | 0.263     | 0.288     | 0.263        | 159.81      | 156.93      | 159.87         |
| 38   | 0.149                 | 0.175                 | 0.148                    | 0.205     | 0.221     | 0.206        | 184.45      | 181.60      | 184.58         |
| 39   | 0.793                 | 0.749                 | 0.793                    | 0.123     | 0.145     | 0.123        | 122.17      | 134.48      | 122.00         |
| 40   | 0.711                 | 0.603                 | 0.712                    | 0.270     | 0.386     | 0.269        | 259.61      | 304.36      | 259.07         |

|           |       |       |       |       |       |       |        |        |        |
|-----------|-------|-------|-------|-------|-------|-------|--------|--------|--------|
| <b>41</b> | 0.699 | 0.618 | 0.701 | 0.182 | 0.259 | 0.181 | 184.17 | 207.44 | 183.46 |
| <b>42</b> | 0.309 | 0.394 | 0.310 | 1.342 | 1.545 | 1.341 | 159.13 | 149.02 | 159.08 |
| <b>43</b> | 0.890 | 0.845 | 0.891 | 0.092 | 0.130 | 0.092 | 83.79  | 99.64  | 83.55  |
| <b>44</b> | 0.043 | 0.062 | 0.043 | 0.202 | 0.208 | 0.203 | 151.59 | 150.10 | 151.66 |
| <b>45</b> | 0.930 | 0.841 | 0.931 | 0.083 | 0.185 | 0.083 | 104.04 | 156.96 | 103.54 |
| <b>46</b> | 0.874 | 0.808 | 0.874 | 0.162 | 0.270 | 0.161 | 196.51 | 242.05 | 196.29 |
| <b>47</b> | 0.581 | 0.559 | 0.582 | 0.133 | 0.188 | 0.133 | 263.32 | 270.34 | 263.20 |
| <b>48</b> | 0.351 | 0.341 | 0.351 | 0.160 | 0.185 | 0.160 | 241.53 | 243.35 | 241.47 |
